# Supplementary material for: Second-order Scalar Wave Field Modeling with First-order Perfectly Matched Layer
Source: Copernicus journal article supplement (doi:10.5194/se-2018-48), 2018-06-11
Supplement: Supplementary file [file se-2018-48-RC2-supplement.pdf]

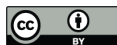

# 1 **Second-order Scalar Wave Field Modeling with First-order** 2 **Perfectly Matched Layer**

3 Xiaoyu Zhang<sup>1</sup>, Dong Zhang<sup>1\*</sup>, Qiong Chen<sup>1</sup>, Yan Yang<sup>1</sup>

4 <sup>1</sup>School of Physics and Technology, Wuhan University, Wuhan, Hubei, China.

5 \*E-mail: [dongz@whu.edu.cn](mailto:dongz@whu.edu.cn)

6 Data of submission 28 May 2018.

7 **Abstract:** The forward modeling of a scalar wave equation plays an important role in the numerical  
8 geophysical computations. The finite-difference algorithm in the form of a second-order wave equation is one  
9 of the commonly used forward numerical algorithms. This algorithm is simple and is easy to implement based  
10 on the conventional-grid. In order to ensure the accuracy of the calculation, absorption layers should be  
11 introduced around the computational area to suppress the wave reflection caused by the artificial boundary.  
12 For boundary absorption conditions, a perfectly matched layer is one of the most effective algorithms.  
13 However, the traditional perfectly matched layer algorithm is calculated using a staggered-grid based on the  
14 first-order wave equation, which is difficult to directly integrate into a conventional-grid finite-difference  
15 algorithm based on the second-order wave equation. Although a perfectly matched layer algorithm based on  
16 the second-order equation can be derived, the formula is rather complex, and intermediate variables need to be  
17 introduced, which makes it hard to implement. In this paper, we present a simple and efficient algorithm to  
18 match the variables at the boundaries between the computational area and the absorbing boundary area. This  
19 new boundary matched method can integrate the traditional staggered-grid perfectly matched layer algorithm  
20 and the conventional-grid finite-difference algorithm without formula transformations, and it can ensure the  
21 accuracy of finite-difference forward modeling in the computational area. In order to verify the validity of our  
22 method, we used several models to carry out numerical simulation experiments. The comparison between the  
23 simulation results of our new boundary matched algorithm and other boundary absorption algorithms shows  
24 that our proposed method suppresses the reflection of the artificial boundaries better and has a higher  
25 computational efficiency.

26 **Keywords:** seismic waves, boundary conditions, absorption, second-order wave equation, conventional-grid.

## 27 **1 Introduction**

28 Modeling of a seismic wave field is accomplished by simulating the pattern of the seismic waves as they  
29 propagate through various geologic media and computing the simulated measurements at observation points on  
30 the Earth's surface or underground, given that the underground medium's structure and the relevant physical  
31 parameters are known. Numerical modeling of a seismic wave field is an important tool for seismic data  
32 processing and interpretation and for geodynamic studies of the Earth's interior. In recent years, many full  
33 waveform inversion methods have been widely proposed and applied to seismic exploration. In the waveform  
34 inversion process, wave field modeling is one of the key algorithms because it must be performed first to obtain  
35 the predicted wave field that is used to compute the residual errors between the predicted and the actual wave

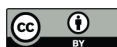

1 field records. In addition, the information provided by the residual errors, which is required for refinement of  
2 the initial model, is actually calculated by a modeling algorithm that uses the residual errors as virtual sources.  
3 After many iterations of the above processes, an optimized approximate model of the underground medium can  
4 be acquired. Numerical modeling of a wave field will be executed thousands of times throughout the waveform  
5 inversion process, so a wave field modeling algorithm is crucial in many ways when performing a waveform  
6 inversion algorithm, such as computational precision, speed, and storage requirements.

7 The main numerical techniques for seismic wave field modeling include the finite-element method  
8 (Marfurt, 1984; Yang et al., 2008), the pseudo-spectral method (Kreiss and Olinger, 1972; Dan and Baysal, 1982),  
9 and the finite-difference method (Kelly et al., 2012; Virieux, 1984; Yang et al., 2002; Moczo et al., 2007; Zhang  
10 et al., 2013). Due to its easy implementation and the satisfactory compromise between accuracy and efficiency,  
11 the finite-difference method is the preferred method. For a comprehensive overview of applications of the finite-  
12 difference methods, see Moczo et al. (2014). Over the last several decades, many studies have focused on  
13 determining the coefficients of the finite-difference method and designing computational templates (Liu et al.,  
14 2017).

15 According to the formulation of the wave equations, the finite-difference methods can be implemented  
16 based on the first-order velocity-stress equations or the second-order displacement equations, which lead to  
17 different computational templates. A **staggered-grid** (SG) is usually set up for the first-order wave equations  
18 and has been widely used with the acoustic and elastic wave equations (Virieux, 1984; Moczo et al., 2014;  
19 Madariaga, 1976; Virieux, 1986; Gold et al., 1997; Saenger et al., 2000; O'Brien, 2010). Many methods of  
20 optimizing the differential coefficients, based on a SG, have been proposed to increase the accuracy of the  
21 numerical solution, such as the time-space domain dispersion-relation-based method (Liu and Sen, 2011), the  
22 simulated annealing algorithm (Zhang and Yao, 2013), and the least-squares method (Yang et al., 2015).  
23 However, a **conventional-grid** (CG) is also often directly obtained from the second-order wave equation. These  
24 methods include the central scheme (Alford et al., 1974; Igel et al., 1995), the high-order compact finite-  
25 difference method (Fornberg, 1990), the Lax-Wendroff correction (LWC) scheme (Lax and Wendroff, 1964;  
26 Dablain, 1986; Blanch and Robertsson, 2010), the nearly analytical discrete method (Yang et al., 2003), and the  
27 nearly analytical central difference method (Yang et al., 2012). The algorithm design of the CG scheme is easier  
28 to use than that of the SG scheme because the variable definition is uniform throughout the grid. However, it is  
29 **not easy** to determine which of the two schemes is more accurate and efficient. Although the SG scheme has  
30 sometimes been regarded as more precise than the CG scheme (Huang and Dong, 2009), there is also some  
31 theoretical and experimental proof in the literature that does not support this proposition. Moczo et al. (2011)  
32 compared the accuracy of the different finite-difference schemes with respect to the P-wave to S-wave speed  
33 ratio using theoretical analysis and numerical experiments. Their investigation determined that the relative local  
34 errors of the CG scheme are almost equal to those of the SG scheme when modeling planar S waves propagating  
35 in an unbounded homogeneous elastic isotropic medium with a low P-wave to S-wave speed ratio ( $V_p/V_s=1.42$ ).  
36 They determined that only at higher P-wave to S-wave speed ratios ( $V_p/V_s=5,10$ ) will the relative local error  
37 of the CG scheme increase faster than that of the SG scheme, but the difference in the relative local errors of  
38 the two schemes will decrease when using a higher-order spatial scheme, i.e., from second-order to fourth-order  
39 in space. Moczo et al. (2011) also determined that the insufficient accuracy of the CG scheme at higher P-wave  
40 to S-wave speed ratios can be compensated for by using a higher spatial sampling ratio; i.e., a smaller grid size.  
41 This means that a CG scheme with a sufficiently small grid size will be as precise as the SG scheme or better,

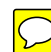

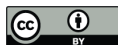

1 even if the P-wave to S-wave speed ratio is high. The computational cost of the SG scheme is significantly  
2 higher than that of an equal-sized CG scheme, because two variables (velocity and stress) must be calculated in  
3 the SG scheme and only one variable (displacement) must be computed in the CG scheme.

4 Reflection from the artificial boundaries introduced by the limited computational area is another numerical  
5 source of error, which can be eliminated with a wave field modeling algorithm. Over the past thirty years, many  
6 techniques have been developed for boundary processing: paraxial conditions (Clayton and Engquist, 1977;  
7 Reynolds, 1978; Higdon, 2012), the sponge boundary (Cerjan et al., 1985; Sochacki et al., 1987), the perfectly  
8 matched layer (PML) (Berenger, 1994), and the hybrid absorbing boundary conditions (hybrid ABC) (Ren and  
9 Liu, 2012). Among these, the PML is one of the most efficient and most commonly used methods. The PML  
10 was first introduced for boundary processing of electromagnetic wave equation modeling, after which, it was  
11 applied to the elastic-dynamic problem (Chew and Liu, 1996) and acoustic simulations (Liu and Tao, 1998).  
12 Many modified versions of the PML, such as the convolutional PML (Komatitsch and Martin, 2007), were  
13 subsequently proposed. Gao et al. (2017) compared most of the typical artificial absorbing boundary processing  
14 approaches for use with acoustic wave equations and came to the conclusion that a 20-layer PML is ideal for  
15 most practical applications using general size models, even in the presence of strong nearly grazing waves,  
16 which demonstrates the high performance and efficiency of the PML approach.

17 In the field of real wave field simulation, most researchers are devoted to unifying the format of the  
18 boundary processing algorithm and the wave equation within the computational region. The classic PML is  
19 naturally formulated based on the first-order wave equations for velocity and stress (Collino and Tsogka, 1998),  
20 which has proven to be very efficient. It is easy to integrate PML boundary processing into a SG finite-  
21 difference algorithm. So some scholars use the SG scheme in the computational region to match the PML  
22 equations, while for many CG-based schemes, they need to adopt other boundary processing methods, such as  
23 the hybrid ABC method. However, in recent years, some scholars have also made efforts to formulate a PML  
24 for a second-order system to match the second-order wave equation. Komatitsch and Tromp (2003)  
25 reformulated the classic PML conditions in order to use it with numerical schemes that are based on the elastic  
26 wave equation written as a second-order system with displacement. Grote and Sim (2010) proposed a PML  
27 formulation for the acoustic wave equation in its standard second-order form, while Posalic and McGarry (2010)  
28 extended the convolutional PML to accommodate the second-order acoustic wave equation. Nevertheless, all  
29 of these second-order PML formulations require the derivation of complex formulas, the introduction of  
30 auxiliary variables, and the modification of existing second-order numerical codes in order to handle the first-  
31 order equations describing the auxiliary variables, which increases the computational cost and complexity.

32 In order to preserve the original efficiency of the PML boundary processing method and the accuracy and  
33 efficiency of the CG scheme, it is worth trying to integrate the classic first-order PML algorithm into the CG  
34 finite-difference scheme in a second-order system, and make it easy to implement. In this paper, we propose a  
35 new boundary matched algorithm that uses a CG finite-difference scheme within a limited computational area  
36 and an SG finite-difference scheme in a PML area. Our approach enables the inner area and the PML condition  
37 to be independent during computation, while preserving the individual advantages of the two methods. The  
38 algorithm matches the computational area and the absorbing boundary layers simply by point updating along  
39 the sides of the computational area and avoids complex formula conversion. Thus, none of the original formulas  
40 of the CG scheme or the PML equations are modified and no unnecessary variables are added. The assessment  
41 of the proposed algorithm is composed of two parts. First, we compared the accuracy and efficiency of the

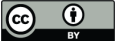

1 proposed algorithm with those of the classic SG PML method (SG scheme both in computational area and PML  
 2 area), which proved the rationality of our decision to use the CG scheme in the computational area. To be closer  
 3 to the actual underground medium, a medium with a linearly increasing velocity gradient was selected for the  
 4 experiment. The experimental results indicate that the accuracy of the two methods for equal grid sizes is almost  
 5 equal, but the efficiency of our method is approximately 30–50 % higher than that of the classic SG PML  
 6 method. Next, the proposed algorithm was evaluated by comparing its absorption efficiency and computational  
 7 cost with those of the classic SG PML method, the second-order PML method (CG scheme both in  
 8 computational area and PML area) introduced by Pasalic and McGarry (2010), and the hybrid ABC method  
 9 (CG scheme in computational area and hybrid ABC scheme in boundary area) introduced by Ren and Liu (2012).  
 10 The numerical experimental results indicate that our algorithm provides an excellent absorption effect, is more  
 11 efficient, and is easier to implement.

## 12 2. Methodology

13 Although the elastic wave equation can describe the propagation of seismic waves more comprehensively,  
 14 modeling an elastic wave field is complex and computationally expensive. In practice, the acoustic wave  
 15 equation is also popularly used to approximate seismic wave propagation. For the convenient error analysis of  
 16 these methods, we consider a scalar wave field  $p$  propagating through an unbounded three-dimensional  
 17 medium where the wave field satisfies Eq. (1) (Engquist and Runborg, 2003).

$$18 \quad \frac{\partial^2 p}{\partial x^2} + \frac{\partial^2 p}{\partial y^2} + \frac{\partial^2 p}{\partial z^2} = \frac{1}{c^2} \cdot \frac{\partial^2 p}{\partial t^2} \quad (1)$$

19 Where the wave field  $p$  is a function of the space variables  $x, y, z$  and the time variable  $t$ , and  $c$  is sound  
 20 velocity of the medium. Numeric modeling of Eq. (1) is expressed as follows.

### 21 2.1 Conventional-grid finite-difference scheme

22 The discretization of the acoustic wave equation (1) with a  $2M$ -order finite-difference scheme is (Chu and  
 23 Stoffa, 2012)

$$24 \quad p_{i,j,k}^{n+1} = 2p_{i,j,k}^n - p_{i,j,k}^{n-1} + \frac{c^2 \Delta t^2}{\Delta x^2} [c_0 p_{i,j,k}^n + \sum_{m=1}^M c_m (p_{i-m,j,k}^n + p_{i+m,j,k}^n)]$$

$$25 \quad + \frac{c^2 \Delta t^2}{\Delta y^2} [c_0 p_{i,j,k}^n + \sum_{m=1}^M c_m (p_{i,j-m,k}^n + p_{i,j+m,k}^n)]$$

$$26 \quad + \frac{c^2 \Delta t^2}{\Delta z^2} [c_0 p_{i,j,k}^n + \sum_{m=1}^M c_m (p_{i,j,k-m}^n + p_{i,j,k+m}^n)] \quad (2)$$

27 Where  $c_m$  for all  $m$  are finite-difference coefficients.  $i, j$  and  $k$  denote the discrete spatial variables, and  $n$   
 28 denotes the discrete time variable. The increments  $\Delta x, \Delta y$  and  $\Delta z$  are grid spacings, and  $\Delta t$  is the time step.  
 29 In many applications, a regular rectangular grid with a grid spacing  $\Delta x = \Delta y = \Delta z = d$  is a natural and  
 30 reasonable choice (Moczo et al, 2007).

31 Numerical analyses show that grid dispersion increases with increasing grid size, but decreasing the grid  
 32 size increases the computational cost. High-order finite-difference schemes are able to control this numerical  
 33 dispersion using a larger grid spacing compared with low-order schemes (Tan and Huang, 2014).

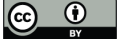

1 Because the subscripts  $i, j$  and  $k$  used in Eq. (2) have integer values, it is convenient to define and calculate  
 2 medium's parameters and wave field  $p$  for the same grid-points, which leads to the CG scheme. The pressure  
 3 source  $s$  is an additive item (Hustedt et al., 2004), i.e., it can be directly added in the corresponding equations.

#### 4 2.2 Boundary conditions

5 Owing to limitations in the capacity and speed of computer facilities, the numerical simulation of a wave  
 6 field can only be implemented for a limited area. The computational area is surrounded by artificial boundaries,  
 7 except for the free surface. As described above, the PML boundary condition can effectively absorb the wave  
 8 field reflections from the artificial boundaries in order to simulate wave field propagation in an open space. In  
 9 a PML medium, the wave field  $p$  is assumed to be decomposed into sub-components. The PML formulation  
 10 based on the acoustic equations is as follows (Liu and Tao, 1998):

$$\begin{aligned}
 11 \quad & \frac{\partial v_x}{\partial t} + \alpha_x v_x = -\frac{1}{\rho} \frac{\partial p}{\partial x} \\
 12 \quad & \frac{\partial v_y}{\partial t} + \alpha_y v_y = -\frac{1}{\rho} \frac{\partial p}{\partial y} \\
 13 \quad & \frac{\partial v_z}{\partial t} + \alpha_z v_z = -\frac{1}{\rho} \frac{\partial p}{\partial z} \\
 14 \quad & \frac{\partial p_x}{\partial t} + \alpha_x p_x = -c^2 \rho \frac{\partial v_x}{\partial x} \\
 15 \quad & \frac{\partial p_y}{\partial t} + \alpha_y p_y = -c^2 \rho \frac{\partial v_y}{\partial y} \\
 16 \quad & \frac{\partial p_z}{\partial t} + \alpha_z p_z = -c^2 \rho \frac{\partial v_z}{\partial z} \\
 17 \quad & p = p_x + p_y + p_z \tag{3}
 \end{aligned}$$

18 Where  $\alpha_x, \alpha_y, \alpha_z$  are the attenuation coefficients in the PML medium. In this paper, the attenuation  
 19 coefficient was set using the following function (Wang, 2003)

$$20 \quad \alpha_{ij} = B \left[ 1 - \sin\left(\frac{j\pi}{2P_{ml}}\right) \right], i = x, y, z; j = 0, 1, \dots, P_{ml} \tag{4}$$

21 Where  $B$  is the amplitude of attenuation coefficient, i.e., the maximum value of the coefficient, which we set as  
 22 400 in the numerical experiment;  $P_{ml}$  is the thickness of the PML layer.

23 Using the SG finite-difference scheme to discretize (4), the results are as follows

$$\begin{aligned}
 24 \quad & v_x^{n+\frac{1}{2}}\left(i+\frac{1}{2}, j, k\right) = v_x^{n-\frac{1}{2}}\left(i+\frac{1}{2}, j, k\right) - \alpha_x \Delta t v_x^{n-\frac{1}{2}}\left(i+\frac{1}{2}, j, k\right) \\
 25 \quad & \quad - \frac{\Delta t}{\rho \Delta x} [p_x^n(i+1, j, k) + p_y^n(i+1, j, k) + p_z^n(i+1, j, k) - p_x^n(i, j, k) - p_y^n(i, j, k) - p_z^n(i, j, k)] \\
 26 \quad & v_y^{n+\frac{1}{2}}\left(i, j+\frac{1}{2}, k\right) = v_y^{n-\frac{1}{2}}\left(i, j+\frac{1}{2}, k\right) - \alpha_y \Delta t v_y^{n-\frac{1}{2}}\left(i, j+\frac{1}{2}, k\right) \\
 27 \quad & \quad - \frac{\Delta t}{\rho \Delta y} [p_x^n(i, j+1, k) + p_y^n(i, j+1, k) + p_z^n(i, j+1, k) - p_x^n(i, j, k) - p_y^n(i, j, k) - p_z^n(i, j, k)] \\
 28 \quad & v_z^{n+\frac{1}{2}}\left(i, j, k+\frac{1}{2}\right) = v_z^{n-\frac{1}{2}}\left(i, j, k+\frac{1}{2}\right) - \alpha_z \Delta t v_z^{n-\frac{1}{2}}\left(i, j, k+\frac{1}{2}\right) \\
 29 \quad & \quad - \frac{\Delta t}{\rho \Delta z} [p_x^n(i, j, k+1) + p_y^n(i, j, k+1) + p_z^n(i, j, k+1) - p_x^n(i, j, k) - p_y^n(i, j, k) - p_z^n(i, j, k)] \\
 30 \quad & p_x^{n+1}(i, j, k) = p_x^n(i, j, k) - \alpha_x \Delta t p_x^n(i, j, k) - \frac{c^2 \rho \Delta t}{\Delta x} \left[ v_x^{n+\frac{1}{2}}\left(i+\frac{1}{2}, j, k\right) - v_x^{n+\frac{1}{2}}\left(i-\frac{1}{2}, j, k\right) \right] \\
 31 \quad & p_y^{n+1}(i, j, k) = p_y^n(i, j, k) - \alpha_y \Delta t p_y^n(i, j, k) - \frac{c^2 \rho \Delta t}{\Delta y} \left[ v_y^{n+\frac{1}{2}}\left(i, j+\frac{1}{2}, k\right) - v_y^{n+\frac{1}{2}}\left(i, j-\frac{1}{2}, k\right) \right]
 \end{aligned}$$

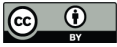

$$1 \quad p_z^{n+1}(i, j, k) = p_z^n(i, j, k) - \alpha_z \Delta t p_z^n(i, j, k) - \frac{c^2 \rho \Delta t}{\Delta z} [v_z^{n+\frac{1}{2}}(i, j, k + \frac{1}{2}) - v_z^{n+\frac{1}{2}}(i, j, k - \frac{1}{2})] \quad (5)$$

### 2 **2.3 Implementation of our new boundary matched algorithm**

3 A finite-difference scheme based on a CG requires no computation of intermediate variables, and thus, the  
 4 computational cost is lower than that of an SG scheme. We will show in the next section that the accuracy of  
 5 the CG scheme can reach the same level as that of the SG scheme, but with lower computational costs. However,  
 6 it is difficult to integrate a naturally formulated, available PML boundary processing algorithm based on an SG  
 7 scheme into a CG finite-difference scheme. In this paper, we propose a new boundary matched algorithm that  
 8 can seamlessly connect an SG-based PML algorithm to a CG-based numerical simulation of a seismic wave  
 9 field with neither introduction of intermediary variables nor reformulation of the PML equations. The core idea  
 10 of the scheme is to interface the wave field reasonably along the boundaries between the CG area and the SG  
 11 absorbing layers. A detailed description of the method is given below.

12 As shown in Fig. 1, the entire domain consists of two parts: the computational area and the boundary  
 13 absorbing area. The computational area is located in the center and is surrounded by the absorbing layers. The  
 14 algorithm uses a CG finite-difference scheme within the computational area and an SG finite-difference scheme  
 15 within the boundary absorbing area. If we can reasonably interface the computed values of the wave field  
 16 between the computational area and the boundary absorbing area, then the scheme can perform satisfactorily.  
 17 For a clearer explanation, we start with a two-dimensional model.

18 We let the computational area and the PML area overlap each other for one layer. As shown in Fig. 1, the  
 19 bold red boundary line is both the outermost layer of the computational area and the innermost layer of the PML  
 20 area. On this overlapped layer, both the particle velocity  $v$  and the wave field  $p$  in the PML area are calculated  
 21 using the value of wave field  $p$  in the computational area. Using this method, the two areas can be connected.  
 22 This avoids the introduction of intermediate variables and saves storage space. In the PML area, the values of  
 23 attenuation coefficients  $\alpha_x$  and  $\alpha_z$  can be calculated using Eq. (4). When the grid points are located on the  
 24 four corners of the PML area, the values of  $\alpha_x$  and  $\alpha_z$  are not zero. When they are on the left- and right-hand  
 25 sides of the PML area,  $\alpha_x \neq 0$  and  $\alpha_z = 0$ ; when they are on the upper and lower sides of the PML area,  $\alpha_x =$   
 26  $0$  and  $\alpha_z \neq 0$ . The specific steps of our method are as follows.

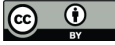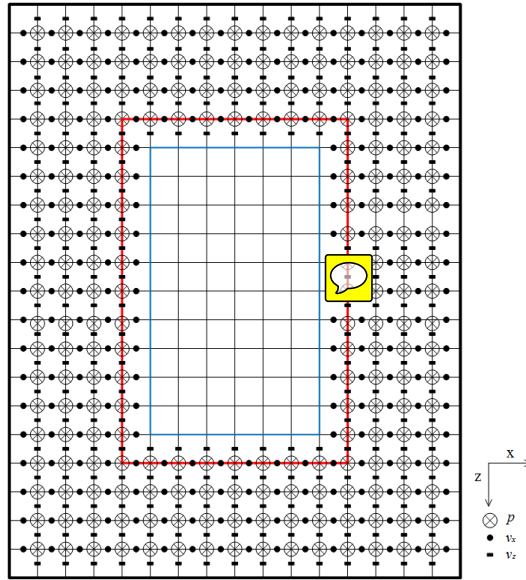

**Figure 1.** Schematic of the entire region.

1  
2

3 1. At the beginning of iteration, take  $n = 1$ , let the initial wave field values  $p_{i,j}^n$  and  $p_{i,j}^{n-1}$  in the  
 4 computational area, the particle velocity  $v_x^{n-\frac{1}{2}}(i + \frac{1}{2}, j)$  and  $v_z^{n-\frac{1}{2}}(i, j + \frac{1}{2})$ , the wave field  $p_x^n(i, j)$  and  
 5  $p_z^n(i, j)$  in the PML area all be zero.

6 2. Calculate the wave field  $p_{i,j}^{n+1}$  in the computational area. In this step, we do not calculate the value of  
 7 wave field  $p_{i,j}^{n+1}$  located on the red boundary line; that is, we only calculate them on the blue boundary line and  
 8 in its inner region in Fig. 1 using the two-dimensional form of Eq. (2)

9 3. Calculate the particle velocity and wave field in the PML area layer by layer, from left to right and from  
 10 top to bottom. Calculate the values of all particle velocity  $v_x^{n+\frac{1}{2}}(i + \frac{1}{2}, j)$  and  $v_z^{n+\frac{1}{2}}(i, j + \frac{1}{2})$  in the PML area  
 11 (including those on the red line) using the two-dimensional forms of the first and second formulas in Eq. (5).  
 12 Calculate the all of the wave field values  $p_x^{n+1}(i, j)$  and  $p_z^{n+1}(i, j)$  in the PML area (including those on the red  
 13 line) using the two-dimensional forms of the fourth and fifth formulas in Eq. (5).

14 It is important to note that the particle velocities in the area between the blue and red lines is calculated  
 15 from the wave field  $p_x^n(i_r, j_r)$  and  $p_z^n(i_r, j_r)$  on the red line in the PML area and the wave field  $p_{i_b, j_b}^n$  on the  
 16 blue line in the computational area. Using Eq. (6), we obtain  $v_x^{n+\frac{1}{2}}(i_r + \frac{1}{2}, j_r)$  for the line between the left-  
 17 hand line of the red rectangle and blue rectangle; Using Eq. (7), we obtain  $v_x^{n+\frac{1}{2}}(i_r - \frac{1}{2}, j_r)$  between the left  
 18 of right-hand line of two rectangles; for the line between the upper lines, we obtain  $v_z^{n+\frac{1}{2}}(i_r, j_r + \frac{1}{2})$  using Eq.  
 19 (8); for the line between the lower lines, we obtain  $v_z^{n+\frac{1}{2}}(i_r, j_r - \frac{1}{2})$  using Eq. (9):

20 
$$v_x^{n+\frac{1}{2}}(i_r + \frac{1}{2}, j_r) = v_x^{n-\frac{1}{2}}(i_r + \frac{1}{2}, j_r) - \alpha_x \Delta t v_x^{n-\frac{1}{2}}(i_r + \frac{1}{2}, j_r) - \frac{\Delta t}{\rho \Delta x} [p_{i_b, j_b}^n - p_x^n(i_r, j_r) - p_z^n(i_r, j_r)] \quad (6)$$

21 
$$v_x^{n+\frac{1}{2}}(i_r - \frac{1}{2}, j_r) = v_x^{n-\frac{1}{2}}(i_r - \frac{1}{2}, j_r) - \alpha_x \Delta t v_x^{n-\frac{1}{2}}(i_r - \frac{1}{2}, j_r) - \frac{\Delta t}{\rho \Delta x} [p_x^n(i_r, j_r) + p_z^n(i_r, j_r) - p_{i_b, j_b}^n] \quad (7)$$



$$1 \quad v_z^{n+\frac{1}{2}}(i_r, j_r + \frac{1}{2}) = v_z^{n-\frac{1}{2}}(i_r, j_r + \frac{1}{2}) - \alpha_z \Delta t v_z^{n-\frac{1}{2}}(i_r, j_r + \frac{1}{2}) - \frac{\Delta t}{\rho \Delta z} [p_{i_b, j_b}^n - p_x^n(i_r, j_r) - p_z^n(i_r, j_r)] \quad (8)$$

$$2 \quad v_z^{n+\frac{1}{2}}(i_r, j_r - \frac{1}{2}) = v_z^{n-\frac{1}{2}}(i_r, j_r - \frac{1}{2}) - \alpha_z \Delta t v_z^{n-\frac{1}{2}}(i_r, j_r - \frac{1}{2}) - \frac{\Delta t}{\rho \Delta z} [p_x^n(i_r, j_r) + p_z^n(i_r, j_r) - p_{i_b, j_b}^n] \quad (9)$$

3 After calculating the complete PML area, let the value of the wave field  $p_{i,j}^{n+1}$  on the red line in the  
 4 computational area be equal to the sum of the wave field  $p_x^{n+1}(i_r, j_r)$  and  $p_z^{n+1}(i_r, j_r)$  on the red line in the  
 5 PML area.

6 4. Update the value of  $p_{i,j}^{n-1}$  with the value of  $p_{i,j}^n$ , and update the value of  $p_{i,j}^n$  with the value of  $p_{i,j}^{n+1}$ ;  
 7 then, let  $n = n + 1$ .

8 5. Repeat steps 2–4 until  $n$  reaches the required time length.

9 The two-dimensional algorithm described above can easily be generalized to three-dimensional. In the  
 10 three-dimensional model, we need to add a particle velocity component  $v_y$  and a space position label  $k$ . The  
 11 red and blue boundary lines become the red and blue boundary surfaces, respectively. In addition, the  
 12 computational area becomes a cube surrounded by the PML area.

### 13 3. Performance analysis

14 As described in the Introduction, the errors in the wave field numerical model are mainly caused by  
 15 differential dispersion and reflected waves that are not fully absorbed by the boundary processing algorithm. In  
 16 order to verify the validity of our algorithm, we used a variety of models to compare the computational accuracy,  
 17 the efficiency of the absorption of the reflected waves, and the computational efficiency of the proposed  
 18 algorithm to the other methods.

#### 19 3.1 Computational accuracy formula

20 In order to obtain a more convincing result when comparing the computational accuracy, we used a  
 21 constant-gradient velocity model, the velocity of which increases linearly with depth. This model is closer to  
 22 the actual velocity distribution of an underground medium than a homogeneous model. We calculated the  
 23 relative error between our method and the classic SG PML method using the analytical solutions for different  
 24 grid spacings and the order of difference, and then, we performed a comparative analysis of the two methods.  
 25 The relative error between the two methods and the analytical solution is defined by the following time function:

$$26 \quad \text{error}(t) = 20 \log \left| \frac{p(t) - p_{anal}(t)}{\max |p_{anal}(t)|} \right| \quad (10)$$

27 Where  $p(t)$  represents the value of wave field calculated by the numerical methods at a receiving point, and  
 28  $p_{anal}(t)$  is the value of wave field calculated by the analytic solution at the same receiving point.

29 For the two-dimensional scalar equation (1), the wave field analytic solution for a homogeneous medium  
 30 can be obtained from the integral form of the three-dimensional solution using the dimension reduction method  
 31 (Cerveny, 2001). The velocity distribution is  $c(z) = c(z_0) \frac{1+\gamma z}{1+\gamma z_0} = c(0)(1 + \gamma z)$ , where  $z_0$  is the depth of  
 32 source,  $c(z_0)$  is the velocity of the source layer,  $c(0)$  is the velocity of the layer  $z = 0$ , and  $\gamma = \frac{1}{h}$ , where  
 33  $c(-h) = 0$ . When the line source  $s = \delta(t - t_0)\delta(x - x_0)\delta(z - z_0)$  is located at  $(x_0, z_0)$ , and the density in





1 the method of Sanchez-Sesma et al. (2001) is a constant, a two-dimensional scalar Green's function can be  
 2 obtained by

$$3 \quad G(x, z, t) \approx \Lambda \cdot \frac{H(t-t_0-\tau)}{2\pi\sqrt{(t-t_0)^2-\tau^2}} \quad (11)$$

$$4 \quad \text{Where } \Lambda = \sqrt{\frac{1+\gamma z_0}{1+\gamma z} \cdot \frac{c(z_0)\tau}{R_w}}$$

5  $H(t)$  is the Heaviside step function (equal to 0 when  $t < 0$  and equal to 1 when  $t > 0$ ), For fixed  $t$ , the radius  
 6  $R_w$  of the wavefront circle is  $R_w = (z_0 + h)\sinh(\gamma c(0)\tau)$  and the traveltime  $\tau$  can be computed by means  
 7 (Cerveny, 2001) of  $\tau = \left| \frac{1}{\gamma c(0)} \operatorname{arccosh} \left[ 1 + \frac{(\gamma c(0)r)^2}{2c(z)c(z_0)} \right] \right|$ ,  $r = \sqrt{(x-x_0)^2 + (z-z_0)^2}$ . This is an approximate  
 8 solution, but usually the error is less than 1% (Sanchez-Sesma et al., 2001). In the next numerical experiment,  
 9 we use a symmetric Ricker wavelet with a peak frequency of 20 Hz as the source. In this paper, the expression  
 10 is usually  $s(t) = \{1 - 2[20\pi(t-t_0-1/20)]^2\}e^{-[20\pi(t-t_0-1/20)]^2}$ ; and  $t_0$  is equal to 200 ms. The final result  
 11 of the analytic solution is

$$12 \quad p_{anal}(x, z, t) = G(x, z, t) * \delta(x-x_0)\delta(z-z_0)S(t) \quad (12)$$

### 13 3.2 Absorption efficiency formula of the reflected waves

14 When comparing the absorption efficiency, we used three different geological models to determine the  
 15 reflected wave absorption effect of our algorithm: the homogeneous, constant-gradient velocity and the  
 16 Marmousi models. We compared the absorption effects of our algorithm with the classic SG PML method, the  
 17 second-order PML method, and the hybrid ABC method using the same conditions to prove whether our  
 18 algorithm can effectively combine the CG scheme with the SG scheme PML boundary condition and achieve  
 19 the same or better effect as other methods do. In the computational area, the reflection coefficient  $R$  of a  
 20 receiving point is defined as

$$21 \quad R = 20 \log \left| \frac{\max[p(t) - p_{ref}(t)]}{\max[p_{ref}(t)]} \right| \quad (13)$$

22 Where the wave field value  $p(t)$  is calculated by the numerical methods at a receiving point, and  $p_{ref}(t)$  is  
 23 the wave field value that has no boundary reflection on the same receiving point calculated using the numerical  
 24 methods, which can be obtained by expanding the model. The value of  $R$  reflects the reflected wave absorption  
 25 effect of the algorithm. The smaller the  $R$  value, the better the absorption effect.

### 26 3.3 Computational efficiency index

27 In the comparison of the computational accuracy and efficiency of the absorption of the reflected waves,  
 28 we determined the computation time of the three methods separately, which can reflect the advantages and  
 29 disadvantages of all of the methods in terms of the computational efficiency.

## 30 4. Numerical experiment

31 Based on the discussion of the performance analysis, in this section, we present the results of the numerical  
 32 experiments. All of the numerical experiments were run on a desktop personal computer with a 3.40 GHz Intel

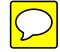

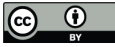

1 Core i5-3570 processor, 32 G of DDR3 memory, on a 64-bit Windows 7 operating system, using algorithmic  
2 software written in C ++.

### 3 4.1 Computational accuracy and computation time

4 As shown in Fig. 2, the constant-gradient velocity model has a size of 6000 m×6000 m, a velocity  
5 distribution of  $c = 500$  m/s for  $z = 0$  m and  $c = 5300$  m/s for  $z = 6000$  m, and a velocity gradient of 0.8. In order  
6 to determine the stability of the differential form throughout the computational process, the time step was set  
7 as 0.001 s and the total simulation time as 10 s. The sources are located in the middle of the model (3000 m,  
8 3000 m), and the three receiving points are located at (600 m, 1800 m), (1800 m, 1800 m), and (3000 m, 1800  
9 m). We compared the errors of the numerical solution and the analytical solution at the receiving points of the  
10 method we proposed with the classic SG PML methods. The number of PMLs is set as 10. Figure 3 and 4 show  
11 the comparison of the analytical solutions at the three receiving points of the proposed method (second-order  
12 CG scheme in the computational area) and the classic PML method (second-order SG scheme in the  
13 computational area) when the grid spacing ( $d$ ) is 12 and 12 respectively. Figure 5 shows the relative errors  
14 between the analytical solutions and the two methods for the conditions described above where the relative  
15 error was calculated using Eq. (10)

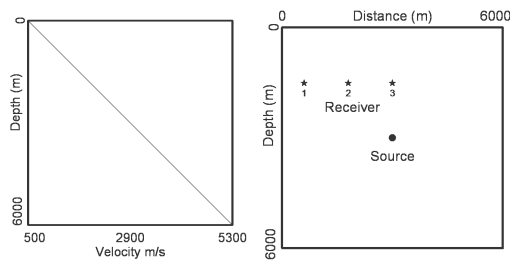

16  
17

**Figure 2.** Velocity profiles in depth and the distribution of source and receiving points.

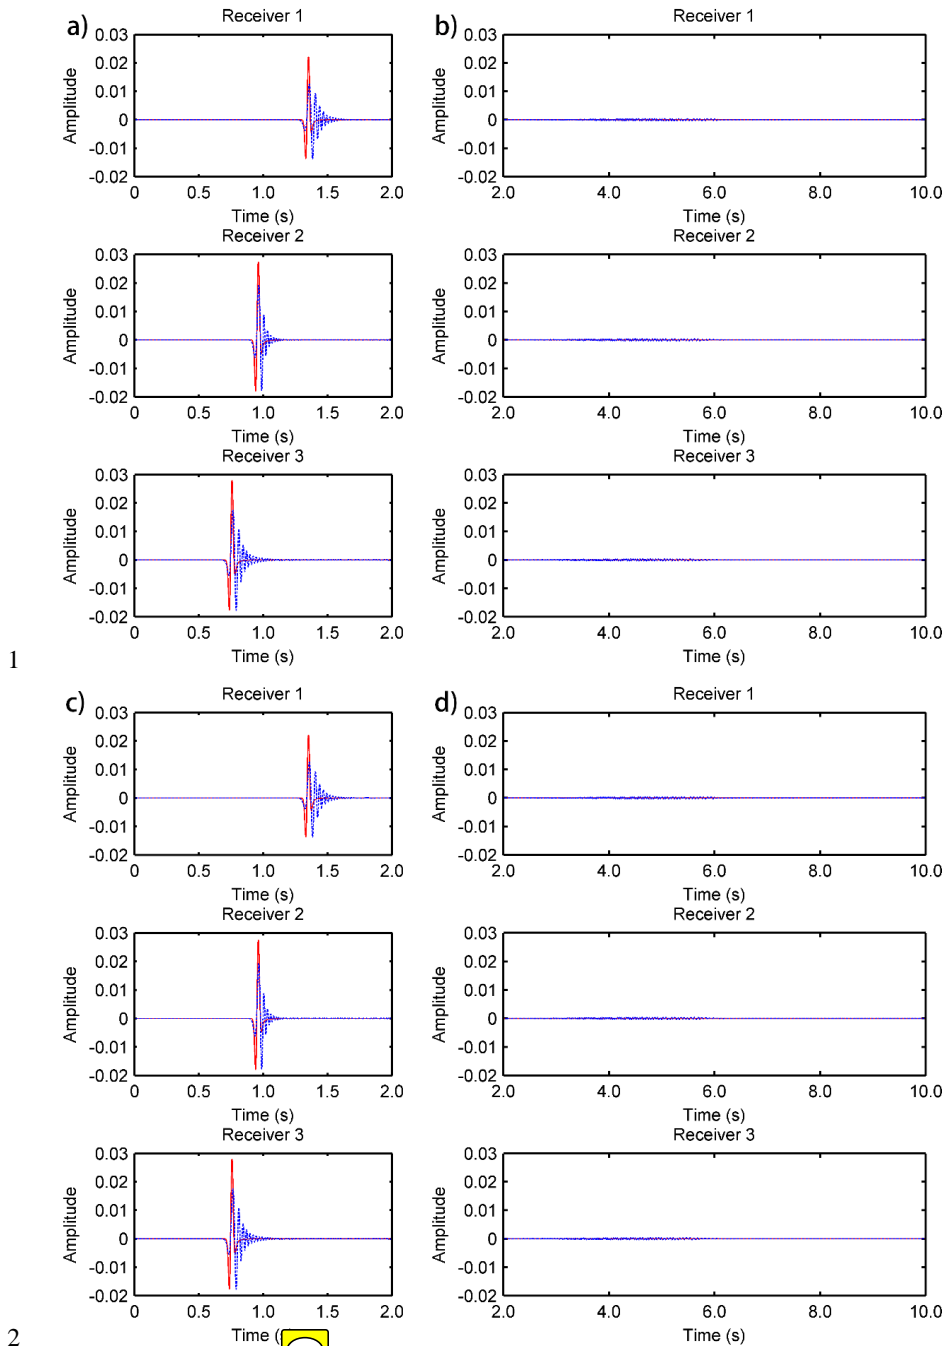

**Figure 3.** Comparison of the analytical solution (red solid line) with the proposed (second-order CG scheme) and classic SG PML methods (second-order SG scheme) (blue dotted line) at different receiving points,  $d = 12$  m. (a) Proposed method at receivers 1, 2, and 3 for the first two seconds; (b) proposed method at receivers 1, 2, and 3 after two seconds; (c) classic SG PML method at receivers 1, 2, and 3 for the first two seconds; and (d) classic SG PML method at receivers 1, 2, and 3 after two seconds.

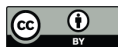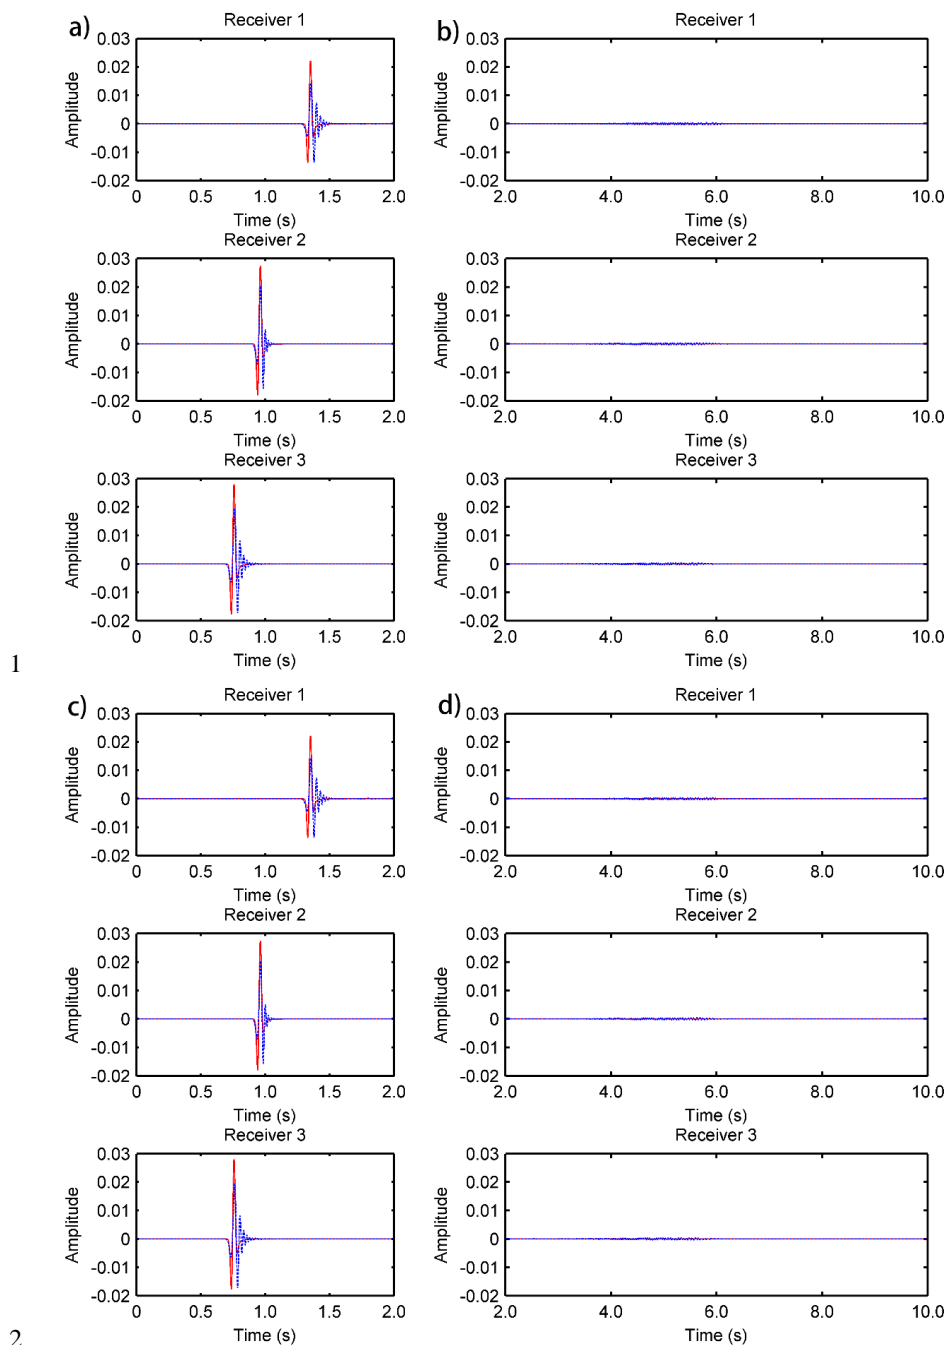

**Figure 4.**  $d = 10$  m; the rest is the same as in Fig. 3.

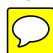

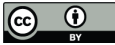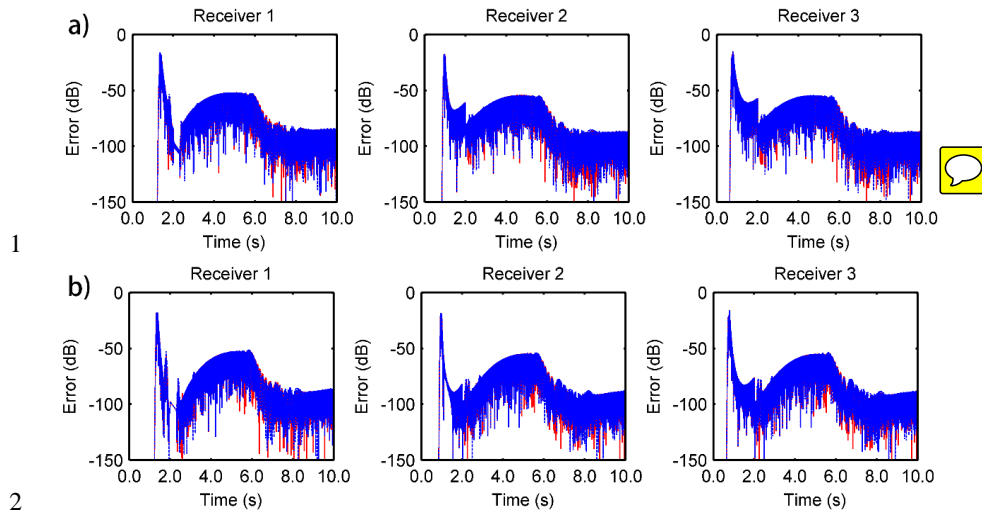

1

2

3

**Figure 5.** Comparison of the relative errors between the analytical solutions and the proposed method (second-order CG scheme) (red solid line) or the classic SG PML method (second-order SG scheme) (blue dotted line) at different receiving points and different grid spacings. (a)  $d = 12$  m, receiving points 1, 2, and 3; (b)  $d = 10$  m, receiving points 1, 2, and 3.

From Fig. 3 and 4, we can see that both of the methods have obvious errors during the first two seconds. In particular, when the grid spacing is 12 m, the error is the largest, and there is significant numerical dispersion. Reducing the grid spacing can reduce the error and the dispersion. When the grid spacing is 10 m, the result improves. In addition, the results for a longer simulation time also prove the numerical stability of our method. Further comparison of the relative error curves shown in Fig. 5 indicates that although neither method is particularly good, the relative errors of their analytical solutions are almost the same. 

In theory, the error of the numerical solution can be reduced by using a higher-order difference. We compared the experimental results of the proposed method (fourth-order CG scheme in the computational area) and classic SG PML methods (fourth-order SG scheme in the computational area) with the analytic solution, as shown in Fig. 6-8.

16

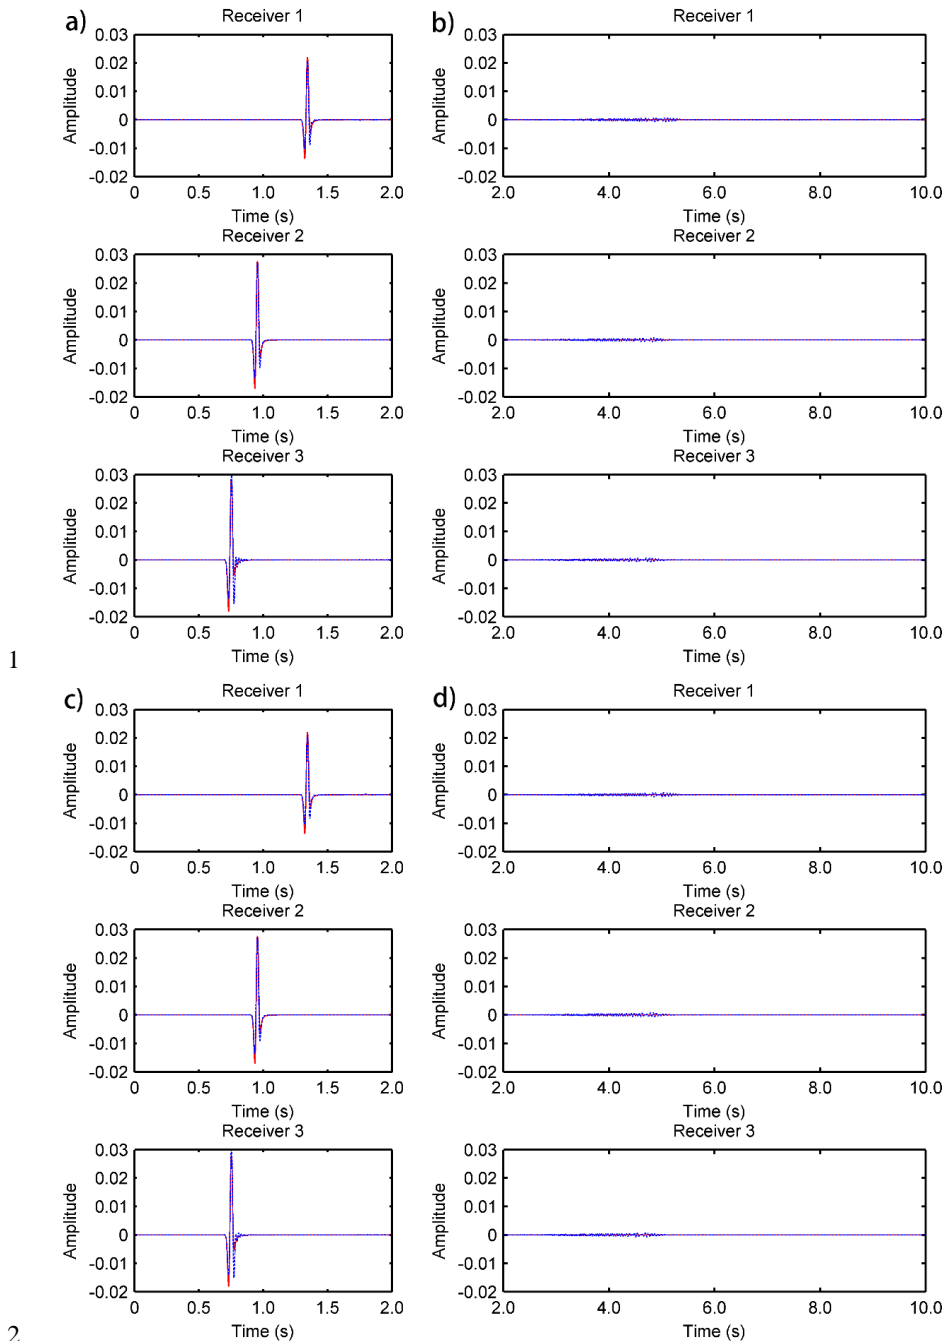

1

2

3

4

5

6

7

**Figure 6.** Comparison of the analytical solution (red solid line) with the proposed (fourth-order CG scheme) and classic SG PML methods (fourth-order SG scheme) (blue dotted line) at different receiving points and  $d = 12$  m. (a) Proposed method at receivers 1, 2, and 3 during the first two seconds; (b) proposed method at receivers 1, 2, and 3 after two seconds; (c) classic SG PML method at receivers 1, 2, and 3 during the first two seconds; and (d) classic SG PML method at receivers 1, 2, and 3 after two seconds.

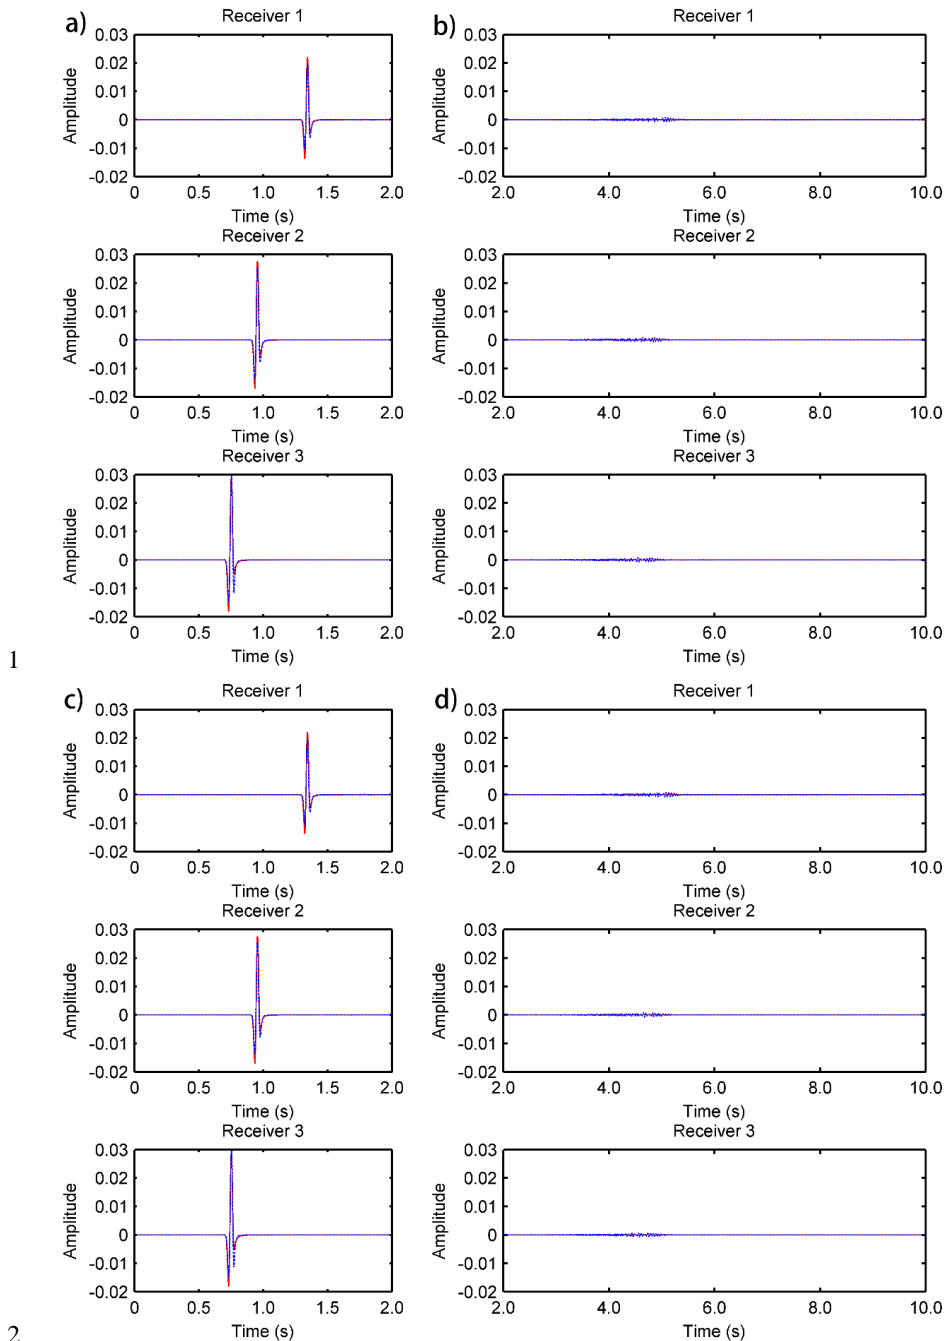

**Figure 7.**  $d = 10$  m; the rest is the same as in Fig. 6.

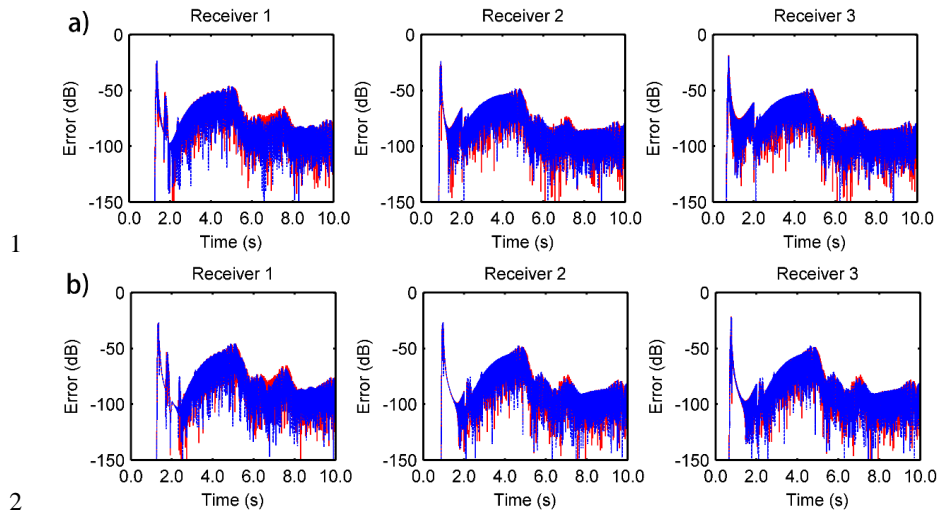

**Figure 8.** Comparison of the relative errors between the analytical solutions and the proposed method (fourth-order CG scheme) (red solid line) or the classic SG PML method (fourth-order SG scheme) (blue dotted line) at different receiving points and different grid spacings. (a)  $d = 12$  m, receiving points 1, 2, and 3; (b)  $d = 10$  m, receiving points 1, 2, and 3.

From Fig. 6 and 7, we can see that when the fourth-order difference is used, the relative errors between the analytical solution and both methods are significantly reduced compared with when the second-order difference is used. In addition, as with the second-order result above, the relative error also decreases as the grid spacing decreases. Figure 8 illustrates the fact that the relative error curves of our algorithm and the classic SG PML method are also very similar for the fourth-order difference. In addition, it is difficult to distinguish the advantages and disadvantages of the two algorithms. Although the results of the two methods still exhibit a small error at this time, we can continue to improve the difference order or we can reduce the grid spacing to reduce the error, but the laws of the two methods are the same.



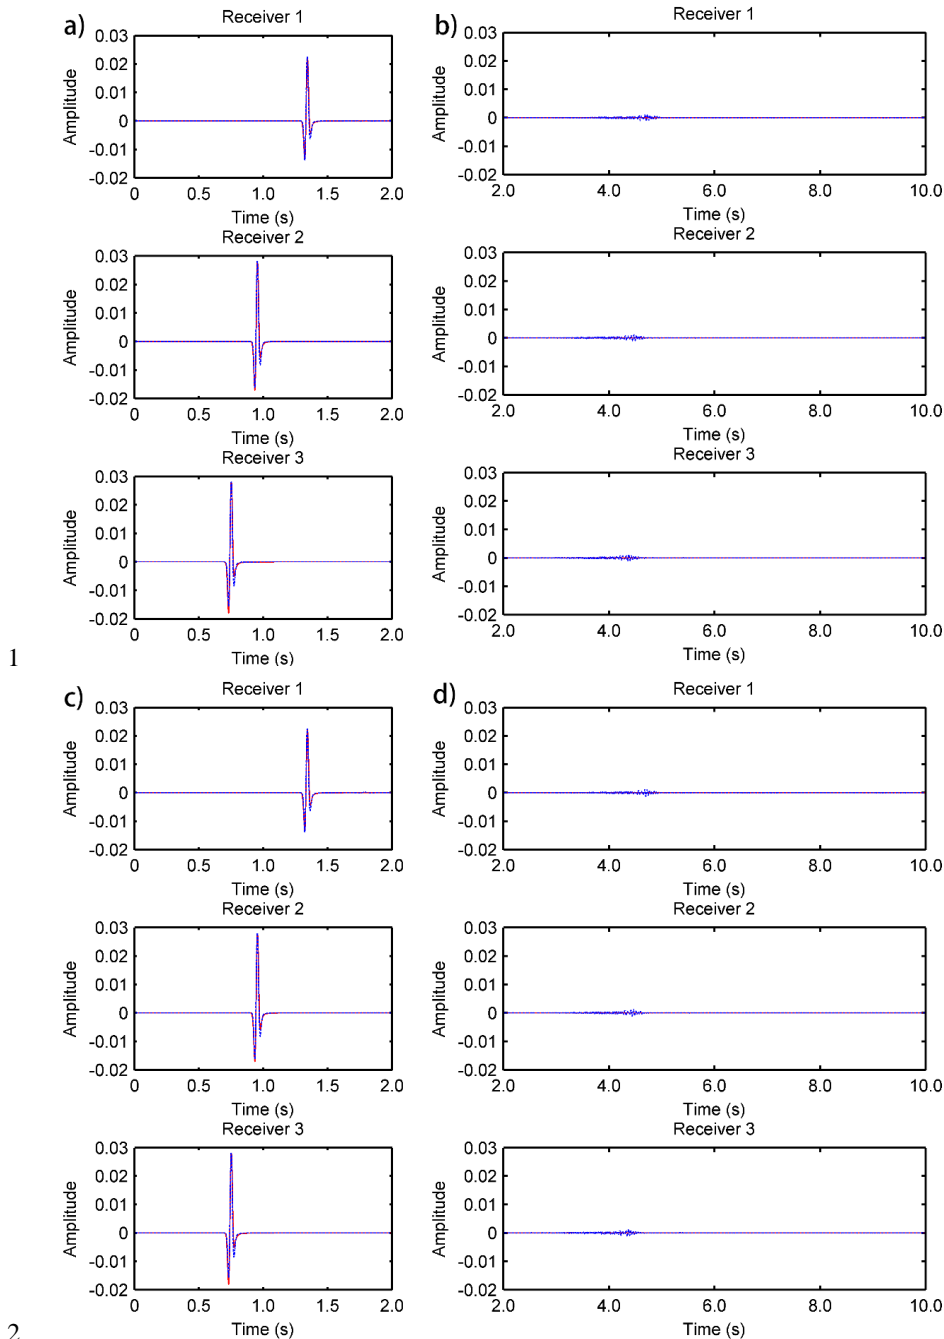

1

2

3

4

5

6

7

**Figure 9** Comparison of the analytical solutions of the proposed (tenth-order CG scheme) (red solid line) and the classic SG PML methods (tenth-order SG scheme) (blue dotted line) at different receiving points,  $d = 10$  m. (a) Proposed method at receivers 1, 2, and 3 during the first two seconds; (b) proposed method at receivers 1, 2, and 3 after two seconds; (c) classic SG PML method at receivers 1, 2, and 3 during the first two seconds; and (d) classic SG PML method at receivers 1, 2, and 3 after two seconds.

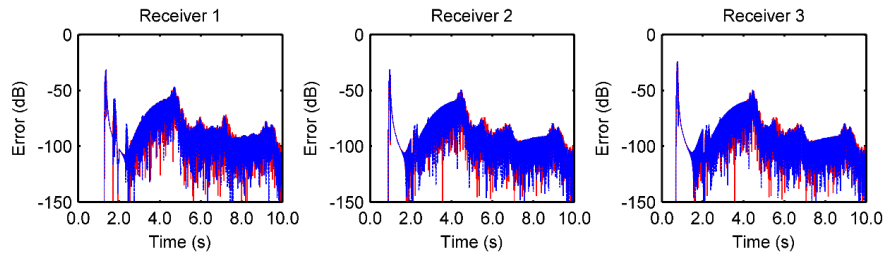

1

2

3

4

5

6

7

8

9

10

11

12

13

14

15

16

17

18

19

20

21

22

23

24

25

26

27

**Figure 10.** Comparison of the relative errors between the analytical solutions and the proposed method (tenth-order CG scheme) (red solid line) or the classic SG PML method (tenth-order SG scheme) (blue dotted line) at different receiving points and different grid spacings.  $d = 10$  m, receiving points 1, 2, and 3.

In Fig. 9 and 10, we adopt a tenth-order difference scheme and  $d = 10$  m. At this time, the numerical results are very close to the analytical solution and the relative error is very low. Based on this, we can conclude that the accuracies of the proposed method and the classic SG PML method for the same conditions with a constant-gradient velocity are similar. Meanwhile, it also demonstrates an additional advantage of our method. When the computational area and the PML area are independent of each other, we can easily optimize the numerical algorithm of the computational area to improve the accuracy of the algorithm. When the grid spacing and the order of difference are appropriate, our method yields the expected results. Because our method uses the CG scheme in the computational area, the experimental results also show that in the scalar wave field simulation, the accuracy of the SG scheme is not higher than that of the CG scheme. This conclusion is in agreement with the experimental results of the elastic wave field simulated by Moczo *et al.* (2011) at a low P-wave to S-wave speed ratio ( $V_p/V_s=1.42$ ).

Table 1 presents the computation times of the two methods at different grid spacings and difference orders. The efficiency percentage is the total computation time of our method divided by the total computation time of the SG method. The total computation time of our method is only 57–70 % that of the classic SG PML method. It is noteworthy that the result of our method for the fourth-order difference and a grid spacing of 12 m is much better than that of the classic SG PML method for the second-order difference and a 10 m grid spacing, while the former computation time is only 53.3 % of the latter. Therefore, for the same computation time as the classic SG PML method, our method always achieves a higher accuracy for a smaller grid spacing and a higher-order difference. We obtained these conclusions in a constant-gradient velocity medium. **Of course, these conclusions also apply to other inhomogeneous mediums.** Therefore, the algorithm we propose works well when the CG scheme is used in the computational area. Next, we discuss the absorption efficiency of the reflected waves of our method in a series of simple and complex models.

**Table 1.** Computation time for our and the classic SG PML methods.

| condition                | Our method | The classic SG PML method | Efficiency percentage |
|--------------------------|------------|---------------------------|-----------------------|
| Second-order<br>$d=12$ m | 10m 19sec  | 15m 17sec                 | 67.5%                 |
| Second-order<br>$d=10$ m | 14m 41sec  | 21m 01sec                 | 69.8%                 |
| fourth-order<br>$d=12$ m | 11m 13sec  | 17m 56sec                 | 62.5%                 |



|                                |           |           |       |
|--------------------------------|-----------|-----------|-------|
| fourth-order<br>$d=10\text{m}$ | 16m 58sec | 25m 54sec | 64.3% |
| tenth-order<br>$d=12\text{m}$  | 18m 20sec | 31m 20sec | 58.5% |
| tenth-order<br>$d=10\text{m}$  | 25m 48sec | 44m 54sec | 57.4% |

#### 1 4.2 Absorption efficiency and computation time

2  First, we used a two-dimensional homogeneous model to verify the reflected wave absorption efficiency  
 3 of our new boundary matched algorithm. As shown in Fig. 11, the model size is 2000 m×2000 m at a velocity  
 4 of  $c = 2500$  m/s, and a grid spacing of 10 m. The source is the same as previously described and is located at  
 5 (1000 m, 1000 m) with a time step of 0.001 s and a total simulation time of 1.5 s. Two hundred and one receiving  
 6 points are evenly distributed on a horizontal line with a depth of 500 m, and the distance between each receiving  
 7 point is set as 10 m. In Fig. 12, we compared the receiving point records of our method, the classic SG PML  
 8 method, the second-order PML method, and the hybrid ABC method for a different number of absorbing layers .  
 9 In general, the amplitude of the reflected wave will be reduced to less than 1% of that of the normal wave field  
 10 after the boundary conditions are processed. Thus, in order to illustrate the reflected wave more clearly, we set  
 11 the range of the color bar of the wave field to be  $-0.001$  to  $0.001$ . For further comparison, we also calculated  
 12 the value of the reflection coefficient  $R$  using Eq. (13) and plotted the corresponding curve in Fig. 13.

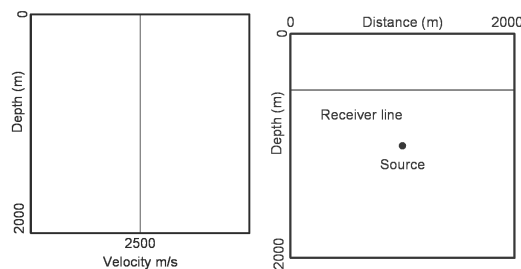

13  
 14

**Figure 11.** Velocity profiles with depth and the location of source and receiving points.

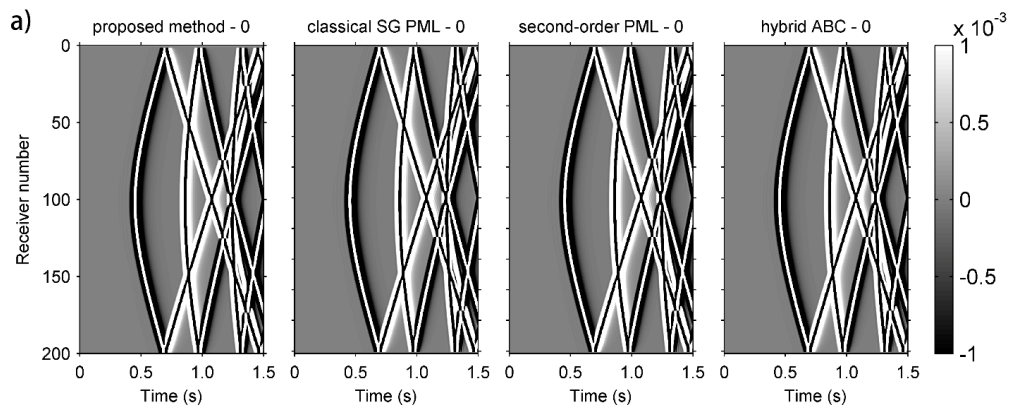

15

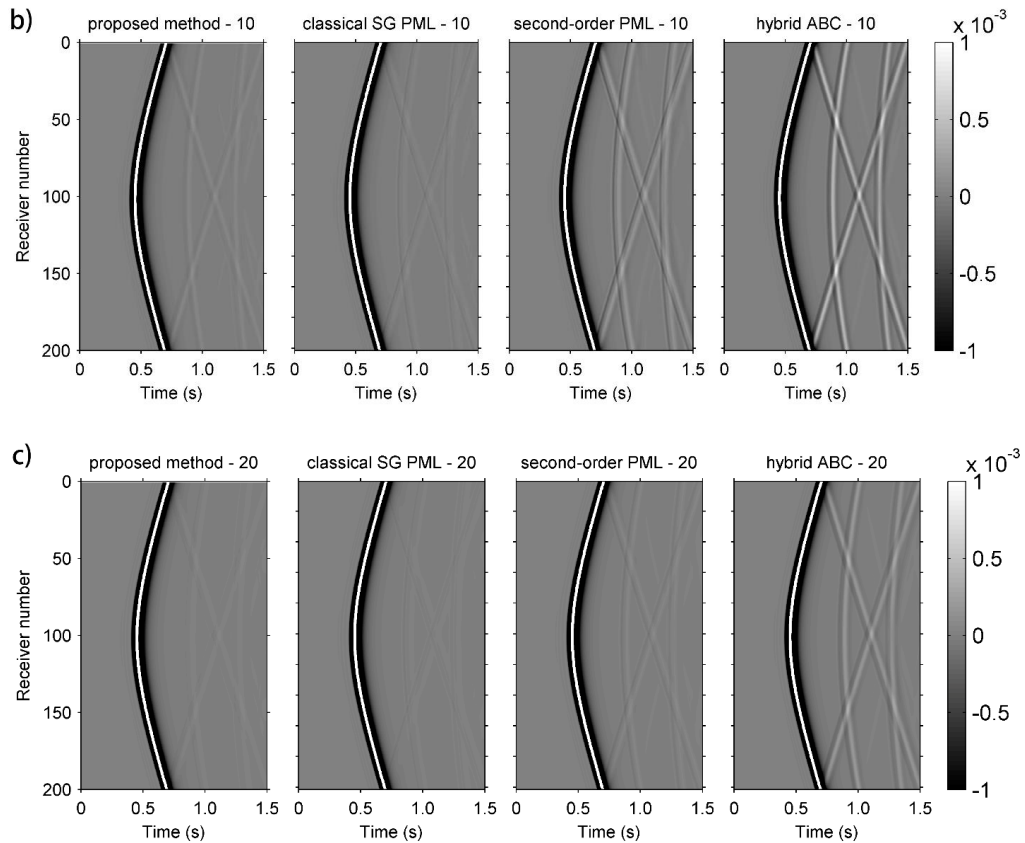

1

2

3

4

**Figure 12.** Receiving point records of the four methods for a different number of absorbing layers: (a) 0 absorbing layers; (b) 10 absorbing layers; and (c) 20 absorbing layers.

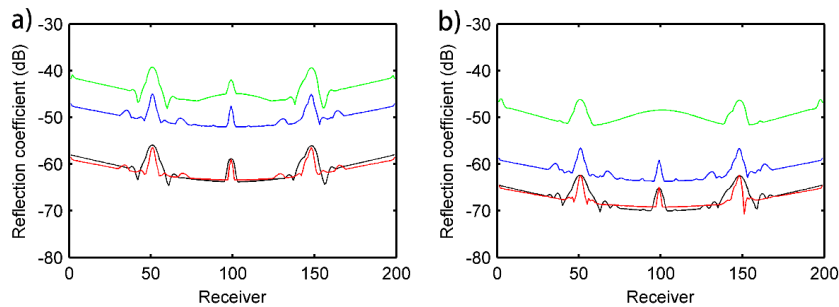

5

6

7

8

9

10

11

12

**Figure 13.** Values of the absorption coefficient  $R$  at each receiving point for our method (red line), the classic SG PML method (black line), the second-order PML method (blue line), and the hybrid ABC method (green line): (a) 10 absorbing layers; and (b) 20 absorbing layers.

As can be seen in Fig. 12 and 13, all of the four methods can absorb the reflected waves to a certain degree. For the same number of absorbing layers, the absorption performance of our method and that of the classic SG PML method are almost the same and both methods are superior to the other two methods, while the hybrid ABC method is the worst. Increasing the number of absorbing layers can improve the absorption effect of the



1 four methods. In addition, the 20-layer, second-order PML method performs similarly to the 10-layer proposed  
 2 method and the 10-layer classic SG PML method. This indicates that the second-order PML method always  
 3 requires more absorbing layers than the first-order PML does.  
 4  Taking into account the fact that the homogeneous model is relatively simple and is quite different from  
 5 the actual distribution of an underground medium, the second model that we use, is the constant-gradient  
 6 velocity model, as shown in Fig. 14. The velocity is 1500 m/s at  $z = 0$  m and 3500 m/s at  $z = 2000$  m, and the  
 7 velocity gradient is 1. The source and receiving point locations are exactly the same as those in the first  
 8 homogeneous model. Figure 15 and 16 compare the receiving point records and the reflection coefficients  $R$  of  
 9 the four methods for different boundary conditions. It can be seen that the absorption effect of this model is not  
 10 as good as that of the homogeneous model, but the results are the same. For the same number of absorbing  
 11 layers, our method has the same absorbing ability as that of the classic SG PML and performs better than the  
 12 other two methods. Also, we still need to use more layers for the second-order PML method instead of using  
 13 the thin method we proposed. In addition, we see that the 10-layer proposed method is much better than the 20-  
 14 layer hybrid ABC method.

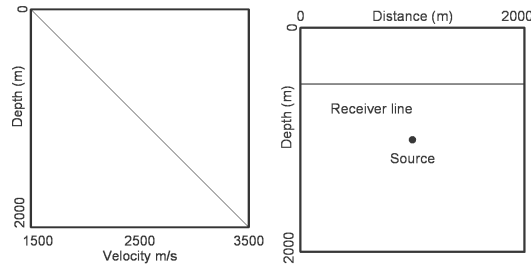

15  
 16 **Figure 14.** Velocity profiles with depth and the location of the source and receiving points.

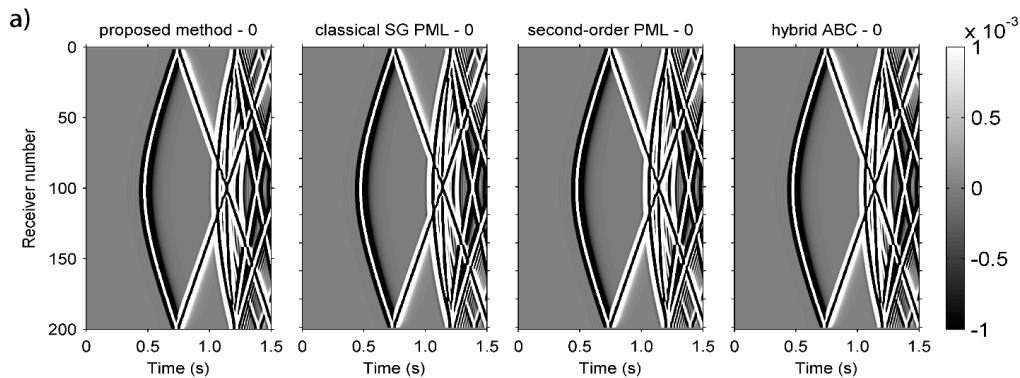

17

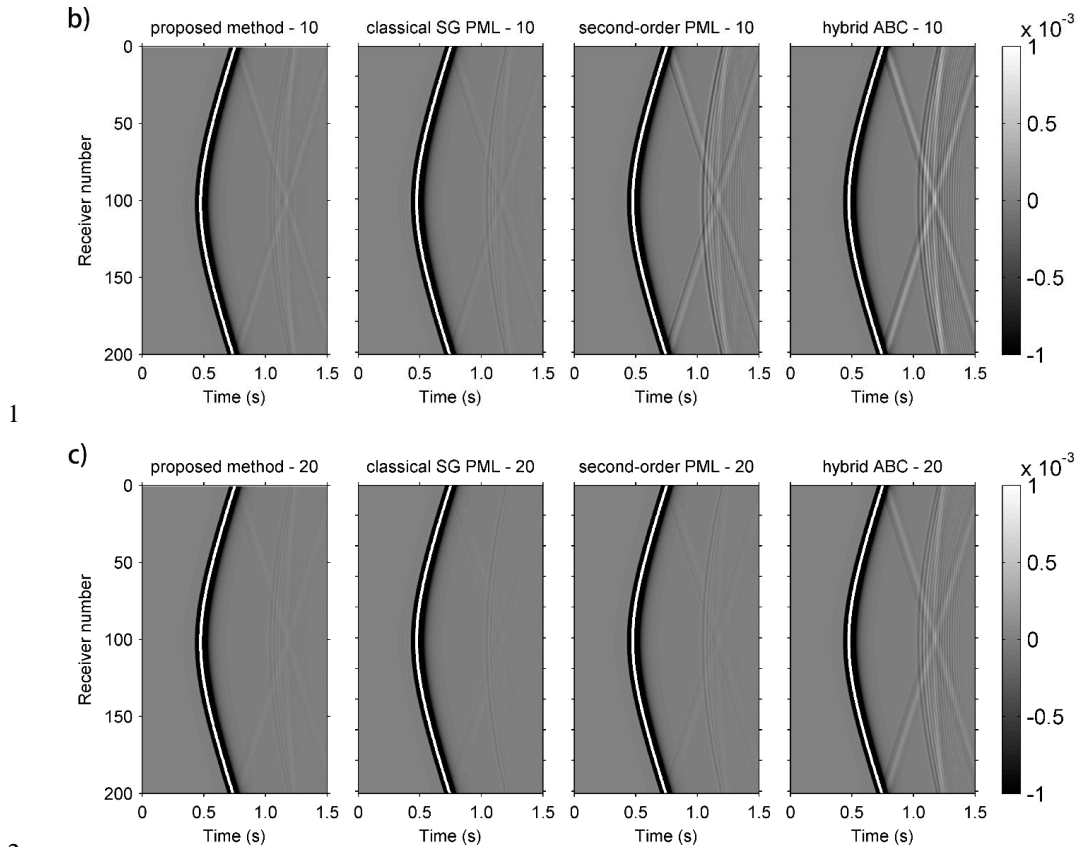

1

2

3

4

**Figure 15.** Receiving point records for the four methods for a different number of absorbing layers: (a) 0 absorbing layers; (b) 10 absorbing layers; and (c) 20 absorbing layers.

5

6

7

8

9

10

11

12

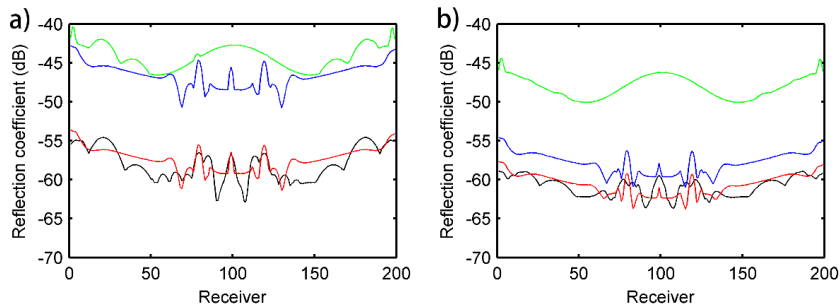

**Figure 16.** Values of the absorption coefficient  $R$  at each receiving point for our method (red line), the classic SG PML method (black line), the second-order PML method (blue line), and the hybrid ABC method (green line): (a) 10 absorbing layers; and (b) 20 absorbing layers.

We next compared the absorption efficiency of the four methods for a complex Marmousi model. The Marmousi model has a size of 9200 m $\times$ 3000 m, a grid spacing of 12.5 m, a time step of 0.001 s, and a total recording time of 8 s. The velocity distribution is shown in Fig. 17. Taking the first shot of the Marmousi model as an example, we can see that the shot is located on the ground surface at a horizontal distance of 3000 m and



1 that the 185 receiving points are evenly distributed between 0–9200 m on the surface. The results in Fig. 18  
2 show that the absorption effect of our method is equal to or better than the absorption effect of the other methods.  
3 When the number of PMLs is 20, the reflected wave is relatively small. Therefore, the method we propose is  
4 also suitable for simulating complex models.

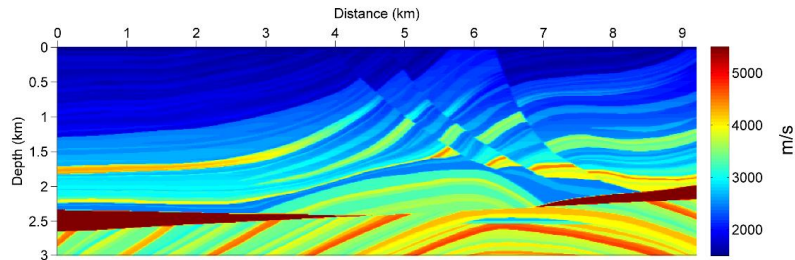

5  
6

Figure 17. Marmousi velocity model

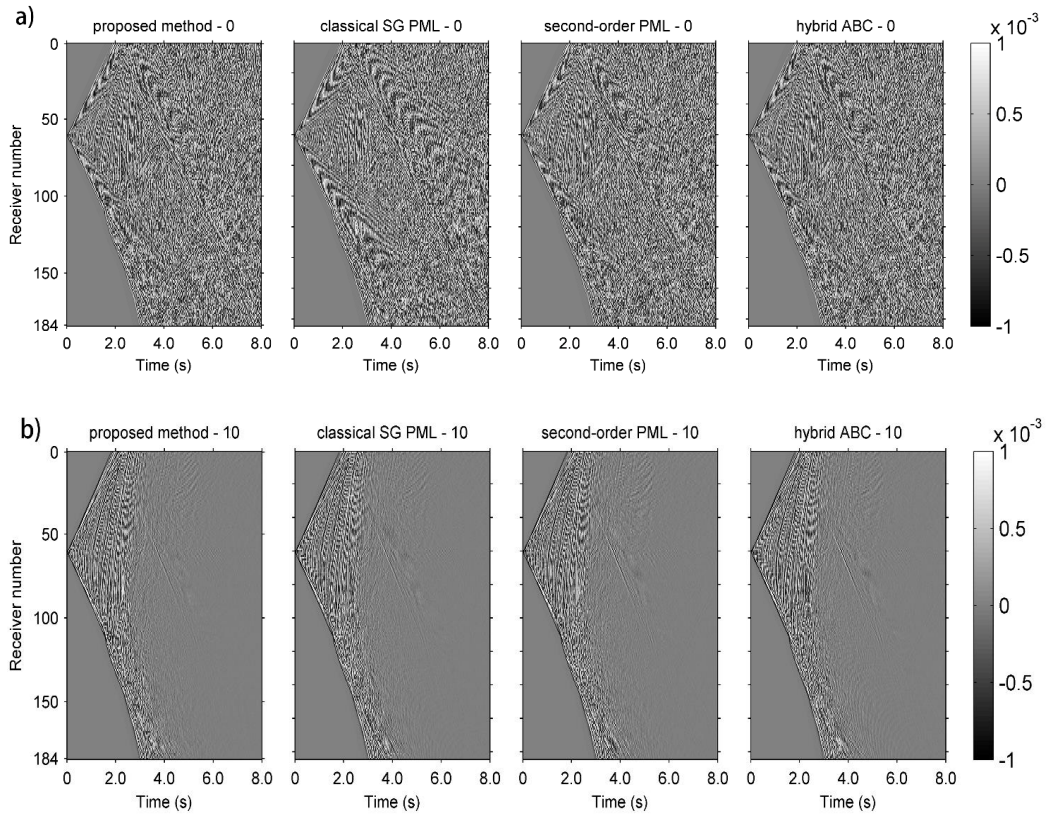

7  
8

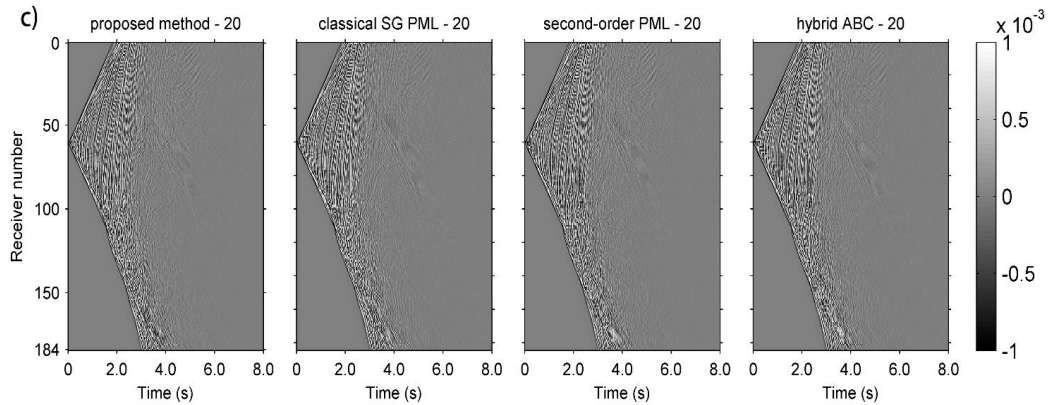

1

2 **Figure 18.** Receiving point records for the four methods for a different number of absorbing layers: (a) 0  
 3 absorbing layers; (b) 10 absorbing layers; and (c) 20 absorbing layers.

4 Based on the above numerical experiments, although the hybrid ABC method is often used as the boundary  
 5 condition of the CG-based method because it is easy to deduce its second-order form, its absorption performance  
 6 is obviously worse than those of the other PML methods since it is based on a one-dimensional wave equation.  
 7 Among the three PML methods, the 10-layer classic SG PML method (first-order PML is used inside) for the  
 8 first-order wave equation is enough to suppress the edge reflections, while the 20-layer second-order PML  
 9 method is sufficient for the second-order wave equation. However, our first-order PML method only requires a  
 10 thickness of 10 grid spacings to absorb the outgoing wave entirely. It may have a significant advantage over the  
 11 second-order PML method. Table 2 shows the computation times of the four methods for different numbers of  
 12 absorbing layers. Among them, the computation time of our method is the shortest and that of the classic SG  
 13 PML method is the longest. Given that our method uses the CG scheme in the computational area, it requires  
 14 much less computation time than the classic SG PML method does. In addition, the second-order PML method  
 15 requires the transformation of the original first-order PML equation into a second-order form. The required  
 16 complex formulas and extra variables without physical meaning increase the computation time. In addition, our  
 17 method naturally implements high-order temporal discretization if necessary, while the second-order PML  
 18 method does not. Therefore, our method is ideal for seismic wave forward modeling.

19

20

**Table 2.** Computation times for the four methods.

| Condition                                     | Our method | Classic SG PML method | Second-order PML method | Hybrid ABC method |
|-----------------------------------------------|------------|-----------------------|-------------------------|-------------------|
| homogeneous model<br>PML=10                   | 20 sec     | 28 sec                | 24 sec                  | 20 sec            |
| homogeneous model<br>PML=20                   | 24 sec     | 34 sec                | 28 sec                  | 25 sec            |
| constant-gradient<br>velocity model<br>PML=10 | 21 sec     | 30 sec                | 26sec                   | 21 sec            |





|                   |            |             |            |            |
|-------------------|------------|-------------|------------|------------|
| constant-gradient |            |             |            |            |
| velocity model    | 25 sec     | 35 sec      | 30 sec     | 26 sec     |
| PML=20            |            |             |            |            |
| Marmousi model    |            |             |            |            |
| PML=10            | 6 m 57 sec | 10 m 31 sec | 8 m 20 sec | 7 m 14 sec |
| Marmousi model    |            |             |            |            |
| PML=20            | 6 m 05 sec | 9 m 05 sec  | 7 m 18 sec | 6 m 25 sec |

### 1 4.3 Three-dimensional homogeneous model

2 In order to facilitate the experiments and comparative analyses, we used the two-dimensional models  
 3 described in the above numerical experiments. To further illustrate the effectiveness of our method, Fig. 19  
 4 shows the experimental results of this method for a three-dimensional homogeneous velocity model. The model  
 5 size is 1000 m×1000 m, the grid spacing is 10 m, and the velocity is 2000 m/s. The source is located at (500 m,  
 6 500 m, 500 m) with a time step of 0.001 s. Figure 19 shows snapshots of the wave field at different times. From  
 7 this we find that when the number of PMLs is 20, the wave field record is very clear, and almost no reflected  
 8 waves are seen.

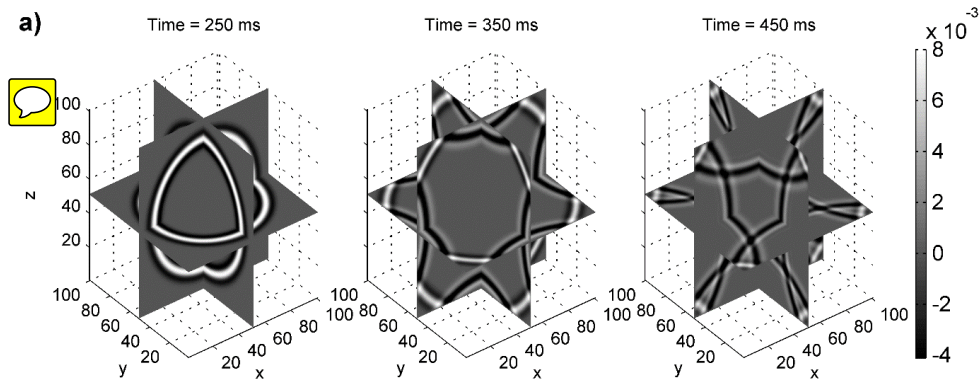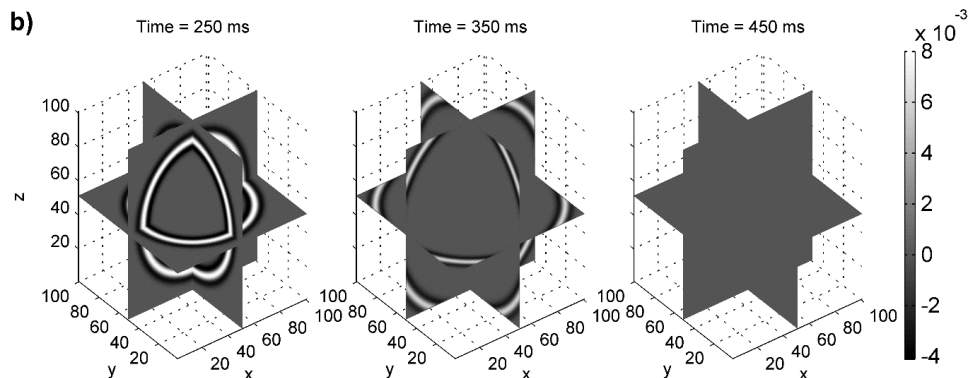



1           **Figure 19.** Wave field snapshots with different PML at different time: (a) PML=0 at 250 ms, 350 ms and  
2 450 ms; (b) PML=20 at 250 ms, 350 ms and 450 ms.

### 3    **5. Conclusions**

4           We propose a new boundary matched algorithm that effectively combines the CG scheme in the  
5 computational area and the SG scheme in the PML boundary conditions, while preserving the high  
6 computational efficiency of the CG scheme and the good absorption effect of PML boundary conditions. Our  
7 proposed method is easy to implement, and we only perform appropriate wave field matching at the grid points,  
8 which avoids ~~complex~~ modifications to the PML formulas and the ~~addition~~ of unnecessary variables. The  
9 numerical experiments of the different models indicate that our method is ~~suitable for use with~~ a variety of  
10 simple and complex two-dimensional and three-dimensional geological models. For the same conditions, our  
11 method can achieve similar or better accuracy and reflected wave absorption efficiency as other boundary  
12 absorption methods, ~~but~~ it requires less computation time. Because our method ~~preserves~~ the independence of  
13 the computational area and the boundary absorption area, it can also be ~~used~~ with other CG-based seismic wave  
14 numerical algorithms, such as the nearly analytical center difference method with PML boundary conditions,  
15 to achieve better numerical simulation accuracy.

16           Our work is based on the numerical simulation of a scalar equation. Because the elastic wave equation  
17 includes more wave field information, it is also widely used in the numerical simulation of seismic waves. The  
18 simulation of the elastic wave equation requires more computations and greater storage capacity, while our  
19 proposed method ~~has a small~~ computational cost. ~~After being properly modified, our method can be used for~~  
20 the numerical simulation of the elastic wave equation ~~and~~ is expected to significantly improve its computational  
21 efficiency, ~~which is the next step in our work.~~

### 22   **Acknowledgments:**

23           This research work was financially supported by the National Science and Technology Major Project of  
24 China under Grant 2011zx05003-003.

### 25   **References**

- 26 Alford, R. M., Kelly, K. R. and Boore, D.: Accuracy of finite-difference modeling of the acoustic wave equation,  
27 Geophysics, 39, 834-842, 1974.
- 28 Berenger, J. P.: A Perfect Matched Layer for the Absorption of Electromagnetic Waves, Journal of  
29 Computational Physics, 114, 185-200, 1994.
- 30 Blanch, J. O. and Robertsson, J. O. A.: A modified Lax-Wendroff correction for wave propagation in media  
31 described by Zener elements, Geophysical Journal of the Royal Astronomical Society, 131, 381-386, 2010.
- 32 Cerjan, C., Kosloff, D., Kosloff, R. and Reshef, M.: A nonreflecting boundary condition for discrete acoustic  
33 and elastic wave equations, Geophysics, 50, 705-708, 1985.
- 34 Cervený, V.: Seismic ray theory, Cambridge University Press, 2001.

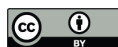

- 1 Chew, W. C. and Liu, Q. H.: Perfectly matched layers for elastodynamics: a new absorbing boundary condition,  
2 Journal of Computational Acoustics, 4, 341-359, 1996.
- 3 Chu, C. L. and Stoffa, P. L.: Determination of finite-difference weights using scaled binomial windows. 2012  
4 Geophysics, 77, W17-W26, 2012.
- 5 Clayton, R. and Engquist, B.: Absorbing boundary conditions for acoustic and elastic wave equations.  
6 Bull.seism.soc.am, 67, 1529-1540, 1977.
- 7 Collino, F. and Tsogka, C.: Application of the perfectly matched absorbing layer model to the linear  
8 elastodynamic problem in anisotropic heterogeneous media, Geophysics, 66, 294-307, 1998.
- 9 Dablain, M. A.: The application of high-order differencing to the scalar wave equation. Geophysics, 51, 54,  
10 1986.
- 11 Dan, D. K. and Baysal, E.: Forward modeling by a Fourier method. Geophysics, 47, 1402-1412, 1982.
- 12 Engquist, B. and Runborg, O.: Computational high frequency wave propagation, Acta Numerica, 12, 181-266,  
13 2003.
- 14 Fornberg B.: High-Order Finite Differences and the Pseudospectral Method on Staggered Grids, Siam Journal  
15 on Numerical Analysis, 27, 904-918, 1990.
- 16 Gao, Y. J., Song, H., Zhang, J. and Yao, Z.: Comparison of artificial absorbing boundaries for acoustic wave  
17 equation modelling, Exploration Geophysics, 48, 76-93, 2017.
- 18 Gold, N., Shapiro, S. A. and Burr, E.: Modelling of high contrasts in elastic media using a modified finite  
19 difference scheme. Seg Technical Program Expanded, 1850-1853, 1997.
- 20 Grote, M. J. and Sim, I.: Efficient PML for the wave equation, Mathematics, 2010.
- 21 Higdon, R. L.: Absorbing boundary conditions for elastic waves: Siam Journal on Numerical Analysis, 31, 64-  
22 100, 2012.
- 23 Huang, C. and Dong, L.: Staggered - Grid High - Order Finite - Difference Method in Elastic Wave  
24 Simulation with Variable Grids and Local Time Steps, Chinese Journal of Geophysics, 52, 1324-1333, 2009.
- 25 Hustedt, B., Operto, S. and Virieux, J.: Mixed-grid and staggered-grid finite-difference methods for frequency-  
26 domain acoustic wave modelling, Geophysical Journal of the Royal Astronomical Society, 157, 1269-1296,  
27 2004.
- 28 Igel, H., Mora, P. and Rioulet, B.: Anisotropic wave propagation through finite-difference grids, Geophysics,  
29 60, 1203-1216, 1995.
- 30 Kelly, K. R., Ward, R. W. Treitel, S. and Alford, R. M.: Synthetic seismograms: a finite-difference approach,  
31 Geophysics, 41, 2-27, 2012.
- 32 Komatitsch, D. and Tromp, J.: A perfectly matched layer absorbing boundary condition for the second-order  
33 seismic wave equation, Geophysical Journal International, 154, 146-153, 2003.
- 34 Komatitsch, D. and Martin, R.: An unsplit convolutional perfectly matched layer improved at grazing incidence  
35 for the seismic wave equation, Geophysics, 72, SM155-SM167, 2007.
- 36 Kreiss, H. O. and Oliger, J.: Comparison of accurate methods for the integration of hyperbolic equations, Tellus,  
37 24, 199-215, 1972.
- 38 Lax, P. D. and Wendroff, B.: Difference schemes for hyperbolic equations with high order of accuracy.  
39 Communications on Pure & Applied Mathematics, 17, 381-398, 1964.
- 40 Li, B., Liu, Y., Sen, M. K. and Ren, Z.: Time-space-domain mesh-free finite difference based on least squares  
41 for 2D acoustic-wave modeling, Geophysics, 82, 143-157, 2017.



- 1 Liu, Q. H. and Tao, J.: The perfectly matched layer for acoustic waves in absorptive media, *Journal of the*  
2 *Acoustical Society of America*, 102, 2072-2082, 1998.
- 3 Liu, Y. and Sen, M. K.: Scalar Wave Equation Modeling with Time-Space Domain Dispersion-Relation-Based  
4 Staggered-Grid Finite-Difference Schemes, *Bull.seism.soc.am*, 101, 141-159, 2011.
- 5 Madariaga, R.: Dynamics of an expanding circular fault, *Bull.seism.soc.am*, 66, 639-666, 1976.
- 6 Marfurt, K. J.: Accuracy of finite-difference and finite-element modeling of the scalar and elastic wave  
7 equations, *Geophysics*, 49, 533-549, 1987.
- 8 Moczo, P. Robertsson, J. O. A. and Eisner, L.: The Finite-Difference Time-Domain Method for Modeling of  
9 Seismic Wave Propagation, *Advances in Geophysics*, 48, 421-516, 2007.
- 10 Moczo, P., Kristek, J., Galis, M., Chaljub, E. and Etienne, V.: 3-D finite-difference, finite-element,  
11 discontinuous-Galerkin and spectral-element schemes analysed for their accuracy with respect to P-wave to S-  
12 wave speed ratio, *Geophysical Journal International*, 187, 1645-1667, 2011.
- 13 Moczo, P., Kristek, J. and Galis, M.: The finite-difference modelling of earthquake motions: waves and ruptures,  
14 Cambridge University Press, 1-365, 2014.
- 15 O'Brien, G. S.: 3D rotated and standard staggered finite-difference solutions to Biot's poroelastic wave  
16 equations: Stability condition and dispersion analysis, *Geophysics*, 75, 111-119, 2010.
- 17 Pasalic, D. and McGarry, R.: Convolutional perfectly matched layer for isotropic and anisotropic acoustic wave  
18 equations, 2010 SEG Annual Meeting. Society of Exploration Geophysicists, 2010.
- 19 Ren, Z. M. and Liu, Y.: A Hybrid Absorbing Boundary Condition for Frequency-Domain Visco-Acoustic  
20 Finite-Difference Modeling, *Journal of Geophysics & Engineering*, 10, 86-95, 2012.
- 21 Reynolds, A. C.: Boundary conditions for the numerical solution of wave propagation problems, *Geophysics*,  
22 43, 155-165, 1978.
- 23 Saenger, E. H., Gold, N. and Shapiro, S. A.: Modeling the propagation of elastic waves using a modified finite-  
24 difference grid, *Wave Motion*, 31, 77-92, 2000.
- 25 Sánchez-Sesma, F. J. Madariaga, R. and Irikura, K.: An approximate elastic two-dimensional Green's function  
26 for a constant-gradient medium, *Geophysical Journal International*, 146, 237-248, 2001.
- 27 Sochacki, J., Kubichek, R., George, J., Fletcher, W. and Smithson, S.: Absorbing boundary conditions and  
28 surface waves, *Geophysics*, 52, 60-71, 1987.
- 29 Tan, S. R. and Huang, L.: A staggered-grid finite-difference scheme optimized in the time-space domain for  
30 modeling scalar-wave propagation in geophysical problems, *Journal of Computational Physics*, 276, 613-634,  
31 2014.
- 32 Virieux, J.: SH-wave propagation in heterogeneous media: Velocity-stress finite-difference method,  
33 *Geophysics*, 49, 1933-1942, 1984.
- 34 Virieux, J.: P-SV wave propagation in heterogeneous media; velocity-stress finite-difference method,  
35 *Geophysics*, 49, 1933-1942, 1986.
- 36 Wang, S. D.: Absorbing boundary condition for acoustic wave equation by perfectly matched layer, *Oil*  
37 *Geophysical Prospecting*, 38, 31-34, 2003.
- 38 Yang, D. H., Teng, J. W., Zhang, Z. J. and Liu, E.: A nearly analytic discrete method for acoustic and elastic  
39 wave equations in anisotropic media, *Bull.seism.soc.am*, 93, 2389-2401, 2003.
- 40 Yang, D. H., Tong, P. and Deng, X.: A central difference method with low numerical dispersion for solving the  
41 scalar wave equation, *Geophysical Prospecting*, 60, 885-905, 2012.



- 1 Yang, D., Liu, E., Zhang, Z., J. and Teng, J.: Finite-difference modelling in two-dimensional anisotropic media
- 2 using a flux-corrected transport technique, *Geophysical Journal International*, 148, 320-328, 2002.
- 3 Yang, D., Liu, E. and Zhang, Z.: Evaluation of the u-W finite element method in anisotropic porous media,
- 4 *Journal of Seismic Exploration*, 17, 273-299, 2008.
- 5 Yang, L., Yan, H. and Liu, H.: Optimal rotated staggered-grid finite-difference schemes for elastic wave
- 6 modeling in TTI media, *Journal of Applied Geophysics*, 122, 40-52, 2015.
- 7 Zhang, J. H. and Yao, Z. X.: Optimized finite-difference operator for broadband seismic wave modeling,
- 8 *Geophysics*, 78, A13-A18, 2013.
- 9 Zhang, Z. G., Zhang, W., Li, H. and Chen, X.: Stable discontinuous grid implementation for collocated-grid
- 10 finite-difference seismic wave modelling, *Geophysical Journal International*, 192, 1179-1188, 2013.
